## Recent changes in candidate genes for domestication in humans in Europe: focusing on language

Antonio Benítez-Burraco\*, Evgeny Chekalin†, Sergey Bruskin†, and Irina Morozova‡

\* Department of Spanish, Linguistics, and Theory of Literature, Faculty of Philology, University of Seville, Seville, Spain

† Vavilov Institute of General Genetics, Russian Academy of Sciences, Moscow, Russia

‡ Institute of Evolutionary Medicine, University of Zurich, Zurich, Switzerland.

Running title: Domestication and language evolution

Keywords: self-domestication, Late Neolithic/Bronze Age, Europe, nonsynonymous SNPs, language evolution

Corresponding author: Antonio Benítez-Burraco

Affiliation: Department of Spanish, Linguistics, and Theory of Literature (Linguistics). Faculty of Philology. University of Seville. Seville, Spain

Address: C/ Palos de la Frontera s/n. 41004-Sevilla (España/Spain)

Phone number: +34 609967099

email: [abenitez8@us.es](mailto:abenitez8@us.es)

[orcid.org/0000-0003-4574-5666](https://orcid.org/0000-0003-4574-5666)

## Abstract

Human evolution resulted from changes in our biology, behavior, and culture. One source of these changes has been hypothesized to be our self-domestication (that is, the development in humans of features commonly found in domesticated strains of mammals, seemingly as a result of selection for reduced aggression). Signals of domestication, notably brain size reduction, have increased in recent times. In this paper we compare whole-genome data between Late Neolithic/Bronze Age individuals and modern Europeans and show that some genes associated with self-domestication and with neural crest development and function in mammals are significantly differently enriched in nonsynonymous single nucleotide polymorphisms between these two groups. We discuss how these changes might account for the exacerbation of features linked to self-domestication and more generally, together with other factors like dietary or social changes, for subtle changes in human cognition and behavior, including language.

## Introduction

Human evolution has entailed multiple changes in our body, cognition, and behavior. These changes are expected to have resulted from selected mutations in selected genes (Grossman et al., 2013; Pääbo, 2014; Field et al., 2016) or from changes in the regulatory landscape of shared genes (Gokhman et al., 2014). Environmental factors, and particularly human culture resulting in a human-specific niche, are expected to have had an important impact on our genome too, because of the relaxation of natural selection, as well as the active selection resulting from some cultural practices (Laland et al., 2010). Beyond well-known cases mostly involving physiological adaptations (like lactase persistence, adaptation to cold climate, and adaptation to high altitude), the complex interaction between biology and culture during human evolution is poorly understood, particularly, regarding human cognition and some of its distinctive features, most notably human language. One recent hypothesis argues that many human distinctive features might have resulted from our self-domestication in response to an early selection towards increased in-group prosociality and reduced aggression (Hare, 2017; Wrangham, 2018). The parallels between domesticated animals and humans (including differences with extinct hominins) have been explored in detail by several authors (Shea, 1989; Leach, 2003; Somel et al., 2009; Zollikofer and Ponce de León, 2010; Herrmann et al., 2011; Plavcan, 2012; Stringer, 2016; Hare, 2017; Thomas and Kirby, 2018). This set of common features, impacting on the skull/brain, the face, or the skin, but also on development (paedomorphosis and neotenus behavior, reduction of sexual dimorphism, tameness) has been hypothesized to result from the hypofunction of the neural crest (NC) (Wilkins et al. 2014). Recent genomic analyses of dogs and domesticated foxes have revealed enrichments of genes linked to neural crest function (Pendleton et al., 2018; Wang et al., 2018). Signs of self-domestication in humans have increased in recent times (reviewed in Hare, 2017). Interestingly too, features of domestication are found abnormal (either exacerbated or attenuated) in clinical conditions impacting on our cognitive abilities, including language, like autism spectrum disorder (Benítez-Burraco et al., 2016) schizophrenia (Benítez-Burraco et al., 2017), or Williams syndrome (Niego and Benítez-Burraco, 2019). At the same time, genomic regions associated with dog-human communication contain genes related to human social disorders, particularly autism spectrum disorder (Persson et al., 2016). Not surprisingly, self-domestication has been invoked to account for the emergence of one of the most relevant human-specific traits, namely, our cognitive ability to learn and use languages (Benítez-Burraco et al., 2018), but also of the sort of languages we use nowadays for communicating (Benítez-Burraco and Kempe, 2018; Thomas and Kirby, 2018). In a nutshell, being able to learn and use a language depends on having a brain with the proper hardware, but also of living in a cultural environment with the proper triggering stimuli. Putting this differently, our cognition accounts for many aspects of the languages we speak, but some language features are an adaptation to the physical and human-made environment and impact in turn, more or less permanently, on our cognitive architecture. Interestingly, human self-domestication can contribute to both processes, because it gives raise to brain/cognitive changes (see Herrmann et al., 2010 for primates), but also contributes to the creation of the niche that enables the emergence of specific aspects of language complexity (like complex syntax) via a cultural mechanism (Benítez-Burraco and Kempe, 2018; Thomas and Kirby, 2018).

Overall, the evidence reviewed above suggests that self-domestication could be considered a process with different degrees of completion. Nonetheless, because of the attested effect of environmental factors, and more generally, our mode of life, on our morphology, physiology, and behavior, as noted above, it is not clear whether the observed differences between ancient anatomically-modern humans (AMHs) and present-day AMHs resulted from the enhancement of our self-domestication, or are instead an unrelated consequence of our adaptation to new, human-made environments.

As also noted, we have detailed characterizations of the genetic differences between humans and our closest relatives, namely, Denisovans and Neanderthals (Grossman et al., 2013; Pääbo, 2014; Field et al., 2016). We also have tentative accounts of the genetic and epigenetic changes important for the emergence of our language-readiness (Boeckx and Benítez-Burraco, 2014a, 2014b, Benítez-Burraco and Boeckx, 2015), as well as a preliminary hypothesis about how these changes could have been translated to changes in the sort of cognitive abilities that are needed for acquiring and mastering a

language (Murphy and Benítez-Burraco 2018a, b). One recent genetic research has shown that candidate genes for domestication in mammals are overrepresented among the genes under positive selection in modern humans compared to extinct hominins (Theofanopoulou et al., 2017). However, no evidence of when these changes were selected is available. Actually, because features of self-domestication have intensified with time, as also noted, we regard of interest to check whether genomic signals of domestication have also intensified recently. If this was the case, one could argue that some late changes in human evolution with an impact on language are certainly associated with our self-domestication, rather than simply with changes of life.

In a recent paper (Chekalin et al., 2019) we compared whole-genome data between Late Neolithic/Bronze Age individuals from 6000 years ago and modern Europeans and showed that several biological pathways were significantly differently enriched in nonsynonymous single nucleotide polymorphisms (SNPs) in these two groups. We argued that these changes, with an impact on metabolism, immune response, physical behavior, perception, reproduction, and cognition, could have been triggered and shaped by cultural practices, particularly, by important changes occurred in Europe at that age. In this paper, we have asked whether a genetic signature of enhanced self-domestication can be found that accounts for the attested enhancement of domestication features in late modern humans. To answer this question, we have analyzed the same two samples of Europeans (Late Neolithic/Bronze Age and modern ones), in order to compare the numbers of nonsynonymous mutations in the groups of genes associated with self-domestication and NC development and function.

## Materials and Methods

Our four different sets of candidates for domestication resulted from i) merging the list we compiled for our paper on features of domestication in schizophrenia (Benítez-Burraco et al. 2017) with the list compiled by Theofanopoulou and collaborators (2017). The merged list includes 764 genes (Supplemental table 1). We also considered ii) the 41 genes highlighted by Theofanopoulou and collaborators as showing evidence of positive selection in modern humans compared to Neanderthals/Denisovans (Supplemental table 1). In view of the suggested role of the NC in the emergence of features of domestication, we considered as well iii) genes important for NC development and function, which we also compiled for our paper on domestication and schizophrenia (Benítez-Burraco et al., 2017). This list encompasses 89 genes (Supplemental table 1), which we gathered using pathogenic and functional criteria: neurochristopathy-associated genes annotated in the OMIM database (<http://omim.org/>), NC markers, genes that are functionally involved in NC induction and specification, genes involved in NC signaling (within NC-derived structures), and genes involved in cranial NC differentiation. Finally, we considered as well iv) the “core” genes highlighted by Wilkins and collaborators (2014) as key candidates for the “domestication syndrome” in mammals (Supplemental table 1).

For all four sets of genes, we performed the calculations analogous to those done in the paper of Chekalin et al., 2019. Briefly, we calculated the significance of the differences in the counts of synonymous and nonsynonymous SNPs between genomes of ancient and modern Europeans. In case these differences have been found, we assessed their nature (accumulation of mutations in the modern group in comparison to ancient one or, in the opposite, reducing the number of mutations). Despite the fact that it is widely accepted that mutations in cis-regulatory regions play a very important role in evolution (King and Wilson, 1975 and many others), the functions of most of the SNPs in the regulatory regions are not yet known, and no confident database of these sort of changes in the human lineage is currently available. For this reason, our analysis was restricted by genome coding regions only. We used differential SNP enrichment scores (DSSE for synonymous SNPs and DNSE for nonsynonymous SNPs) as measures of these differences (Chekalin et al., 2019). The pathways were considered to be differentially enriched if absolute value of the differential SNP enrichment score  $> 4$ , and the adjusted p-value  $< 0.01$  (Bonferroni correction). Negative score values indicated accumulation of mutations in genomes of modern Europeans in comparison with ancient Europeans, while positive score values indicated an opposite pattern.

## Results

We compared whole genome data from 150 ancient samples dated between 3,500 and 1,000 BCE (Allentoft et al., 2015; Gamba et al., 2014; Haak et al., 2015; Mathieson et al., 2015) with data on 305 modern Europeans genotyped in the framework of the 1,000 Genomes Project (Genomes Project et al. 2015), under the assumption that modern Europeans are genetic descendants of the Bronze Age Europeans, as described and discussed in detail in Chekalin et al. (2019) (Figure 1).

[FIGURE 1 ABOUT HERE]

As expected, we have found no significant differences between groups in synonymous SNP enrichment (Table 1), taking into account the neutral character of these mutations. At the same time, we have found a significant enrichment in nonsynonymous SNPs between the Bronze Age and present-day European individuals. Specifically, we have found that candidates for domestication have been accumulating nonsynonymous mutations during the past 6,000 years, whereas candidates for NC exhibit fewer nonsynonymous mutations in present-day humans than in Bronze Age humans. By the reasons we provide in our 2019 paper, these differences are not expected to be caused by an insufficient sequence coverage of Bronze Age individuals or by general inter-population differences between the two groups. By contrast, we have found no significant selection signals in domestication candidates positively selected after our split from Neanderthals and Denisovans, nor in “core” candidates for the domestication syndrome (Table 1).

[TABLE 1 ABOUT HERE]

## Discussion

Self-domestication has been claimed to account for key aspects of human evolution, including the creation of the cultural niche that allowed complex languages to emerge. Although signals of domestication have seemingly increased recently, as showed by the paleoanthropological record (Leach 2003; Zollikofer and Ponce de León, 2010; Stringer, 2016), it is not clear if they resulted from genomic changes that incidentally enable as well to provide a more precise chronological account of the self-domestication events, as it has been possible with several domesticated mammal species (Driscoll et al., 2007; Nomura et al., 2013; Orlando et al., 2013; Freedman et al., 2014; Qiu et al., 2015; Botigué et al., 2017). At present, only one study has addressed this issue, concluding that statistically significant overlaps exist between selective sweep screens in anatomically-modern humans and several domesticated species (Theofanopoulou et al., 2017). Nonetheless, this study is inconclusive about the timing of the self-domestication events, as it relies on previously published (but limited) comparisons between anatomically-modern humans and Neanderthals and Denisovans by Prüfer et al. (2014), Racimo (2016) and Peyrégne et al. (2017).

In this paper, we have shown that two sets of genes associated with self-domestication and NC development and function, respectively, have been selected during the last 6,000 years in Europe, a period when important changes in human behavior and culture occurred, including the spread of agricultural practices and sedentism, urbanization, increasing in population density, development of trading routs, globalization etc. These changes reshaped not only the gene pool of Europe, but also modified its linguistic landscape, because Neolithic languages were almost totally replaced by Indo-European languages (Bouckaert et al., 2012; de Barros et al., 2018; Mathieson, 2018, among many others).

The group of genes that are candidates for domestication in mammals have demonstrated the accumulation of nonsynonymous mutations in the genomes of present-day Europeans in comparison to Bronze Age ones. However, it is worth noticing that this group consists of 764 genes which can be responsible for a number of different biological processes. Further detailed study of this group with its subsequent division into smaller subsets will probably allow us to reveal more diverse patterns of

selections for these genes. We have also found the decrease in nonsynonymous mutations in the modern group in comparison to ancient Europeans in the candidate genes for NC development and function. This can be the evidence of negative or, on the opposite, strong positive selection in the genes responsible for development and function of NC.

Enhanced self-domestication has been recently claimed to contribute to the transition from the so-called esoteric languages, typically spoken by close-knit, small human communities that share a considerable amount of knowledge about the environment, to exoteric languages, better designed for communicating decontextualized information to strangers (Benítez-Burraco and Kempe, 2018). In brief, self-domestication seemingly resulted in a less aggressive behaviour that facilitated the establishment of larger and more complex social networks and enhanced contacts with strangers, which are factors that favour the emergence of exoteric features in languages (phonological simplification, morphological transparency and regularity, expanded vocabularies, more complex syntax). Likewise, self-domestication resulted in an extended juvenile period that increased language learning by children and language teaching by caregivers, which seemingly enables the mastering of exoteric languages, which are most costly to process and learn (see Benítez-Burraco, in press for details). Importantly, whereas self-domestication seemingly contributed to create (together with other factors, like changes in food supply or climatic changes) the human niche that enabled languages to acquire the features linked to exotericity, language evolution itself (and particularly, the type of languages spoken at some point during our evolution) also contributed to our self-domestication, particularly, because verbal interactions seemingly reduce in-group physical aggression (Progovac and Locke 2009).

Our hypothesis is that for the reasons mentioned above, in Europe (and possibly in other parts, but this needs to be checked) this transition to exotericity could be linked to the increased domestication features found among Europeans in that period. Importantly, exoteric languages demand some cognitive adaptation, because their more complex syntax and expanded vocabularies need an enhanced working memory capacity, more executive control, and improved declarative knowledge to be learnt and mastered (see Benítez-Burraco and Kempe, 2018 for a detailed discussion). Interestingly, we previously found in our European samples evidence of selection of two pathways related to cognition, particularly, to long-term potentiation and dopaminergic synapse, which underlies synaptic plasticity and ultimately, memory and learning abilities (Chekalin et al., 2019). Importantly too, these two pathways do not have any shared genes with NC genes. Therefore, the common pattern for these two groups (decrease in nonsynonymous mutations during the last 6,000 years) is due to not shared genetic background but, probably, to common external factors. We then suggested that this selection might be related to changes in ways of information presentation, perception, and transmission. Now, we hypothesize that this external factor might be (also) related to the transition from esoteric to exoteric languages in Europe.

By contrast, we have found no signals of selection in “core” candidates for domestication (Wilkins et al. 2014), many of which are involved in NC development and function. This suggests that, although the NC is seemingly involved in the manifestation of domestication features also in our species, changes in NC development and function could mostly account for early stages of our self-domestication, considering that features of self-domestication, although attenuated, are already present in early anatomically-modern humans (see Theofanopoulou et al., 2017 for discussion). Interestingly too, we have found that the candidates for domestication that show signals of positive selection in anatomically-modern humans compared to Neanderthals and Denisovans have not been subject to selection in Europeans during the last 6,000 years. This lack of selection suggests that they might have been selected earlier in our history, plausibly accounting for the milder domesticated phenotype exhibited by early modern humans compared to present-day humans, and that recent self-domestication events have resulted from selection in other genes, plausibly in response to selection factors that might be different from the ones operating during our speciation.

Overall, our results suggest that human self-domestication is an ongoing process, contributing to important recent changes in the human body and particularly, in human behavior, culture, and perhaps



cognition, with a potential impact on language evolution, and that different genes account for the different stages of the human self-domestication process.

## Acknowledgements

This research was funded by the Spanish Ministry of Economy and Competitiveness (grant FFI2016-78034-C2-2-P [AEI/FEDER, UE] to ABB). We thank Adam Wilkins for some valuable commentaries on a previous version of this manuscript.

## References

- Allentoft ME, Sikora M, Sjogren KG, Rasmussen S, Rasmussen M, Stenderup J, Damgaard PB, Schroeder H, Ahlstrom T, Vinner L, et al. (2015). Population genomics of Bronze Age Eurasia. *Nature* 522: 167-172. doi: 10.1038/nature14507
- Bednarik RG (2014). Doing with less: hominin brain atrophy. *Homo* 65: 433-449. doi: 10.1016/j.jchb.2014.06.001
- Benítez-Burraco A, Boeckx C (2015) Possible functional links among brain- and skull-related genes selected in modern humans. *Front. Psychol.* 6: 794.
- Benítez-Burraco A, Di Pietro L, Barba M, Lattanzi W. (2017). Schizophrenia and human self-domestication: an evolutionary linguistics approach. *Brain Behav Evol.* 89(3):162-184. doi: 10.1159/000468506.
- Benítez-Burraco A, Kempe V (2018). The emergence of modern languages: has human self-domestication optimized language transmission? *Front Psychol.* 9: 551. doi: 10.3389/fpsyg.2018.00551.
- Benítez-Burraco A, Lattanzi W, Murphy E (2016) Language impairments in ASD resulting from a failed domestication of the human brain. *Front. Neurosci.* 10: 373. doi: 10.3389/fnins.2016.00373
- Benítez-Burraco A, Theofanopoulou C, Boeckx C (2018). Globularization and domestication. *Topoi* 37: 265-278 doi: 10.1007/s11245-016-9399-7
- Benítez-Burraco A. (in press) Prehistoric languages and human self-domestication. *Language Dynamics and Change*
- Boeckx C, Benítez-Burraco A (2014a). The shape of the human language-ready brain. *Front. Psychol.* 5:282. 10.3389/fpsyg.2014.00282
- Boeckx C, Benítez-Burraco A. (2014b) Globularity and language-readiness: Generating new predictions by expanding the set of genes of interest. *Front. Psychol.* 5: 1324. doi: 10.3389/fpsyg.2014.01324
- Bouckaert R, Lemey P, Dunn M, Greenhill SJ, Alekseyenko AV, Drummond AJ, Gray RD, Suchard MA, Atkinson QD. (2012) Mapping the origins and expansion of the Indo-European language family. *Science* 337(6097):957-60. doi: 10.1126/science.1219669.
- Chekalin E, Rubanovich A, Tatarinova TV, Kasianov A, Bender N, Chekalina M, Staub K, Koepke N, Rühli F, Bruskin S, Morozova I. (2019) Changes in biological pathways during 6,000 years of civilization in Europe. *Mol Biol Evol.* 36(1):127-140.



de Barros Damgaard P, Martiniano R, Kamm J, Moreno-Mayar JV, Kroonen G, Peyrot M, Barjamovic G, Rasmussen S, Zacho C, Baimukhanov N, Zaibert V, Merz V, Biddanda A, Merz I, Loman V, Evdokimov V, Usmanova E, Hemphill B, Seguin-Orlando A, Yediay FE, Ullah I, Sjögren KG, Iversen KH, Choin J, de la Fuente C, Ilardo M, Schroeder H, Moiseyev V, Gromov A, Polyakov A, Omura S, Senyurt SY, Ahmad H, McKenzie C, Margaryan A, Hameed A, Samad A, Gul N, Khokhar MH, Goriunova OI, Bazaliiskii VI, Novembre J, Weber AW, Orlando L, Allentoft ME, Nielsen R, Kristiansen K, Sikora M, Outram AK, Durbin R, Willerslev E,34. (2018) The first horse herders and the impact of early Bronze Age steppe expansions into Asia. *Science*. 360(6396). pii: eaar7711. doi: 10.1126/science.aar7711.

Field Y, Boyle EA, Telis N, Gao Z, Gaulton KJ, Golan D, Yengo L, Rocheleau G, Froguel P, McCarthy MI, et al. (2016). Detection of human adaptation during the past 2000 years. *Science* 354: 760-764. doi: 10.1126/science.aag0776

Gamba C, Jones ER, Teasdale MD, McLaughlin RL, Gonzalez-Fortes G, Mattiangeli V, Domboroczki L, Kovari I, Pap I, Anders A, et al. (2014). Genome flux and stasis in a five millennium transect of European prehistory. *Nat Commun* 5: 5257. doi: 10.1038/ncomms6257

Genomes Project C, Auton A, Brooks LD, Durbin RM, Garrison EP, Kang HM, Korbel JO, Marchini JL, McCarthy S, McVean GA, et al. (2015). A global reference for human genetic variation. *Nature* 526: 68-74. doi: 10.1038/nature15393

Gokhman D, Lavi E, Prüfer K, Fraga MF, Riancho JA, Kelso J, Pääbo S, Meshorer E, Carmel L. (2014) Reconstructing the DNA methylation maps of the Neandertal and the Denisovan. *Science* 344(6183):523-7. doi: 10.1126/science.1250368.

Grossman SR, Andersen KG, Shlyakhter I, Tabrizi S, Winnicki S, Yen A, Park DJ, Griesemer D, Karlsson EK, Wong SH, et al. (2013). Identifying recent adaptations in large-scale genomic data. *Cell* 152: 703-713. doi: 10.1016/j.cell.2013.01.035

Haak W, Lazaridis I, Patterson N, Rohland N, Mallick S, Llamas B, Brandt G, Nordenfelt S, Harney E, Stewardson K, et al. (2015). Massive migration from the steppe was a source for Indo-European languages in Europe. *Nature* 522: 207-211. doi: 10.1038/nature14317

Hare B. (2017). Survival of the Friendliest: *Homo sapiens* Evolved via Selection for Prosociality. *Annu Rev Psychol*. 68:155-186.

Herrmann E, Hare B, Call J, Tomasello M (2010). Differences in the cognitive skills of bonobos and chimpanzees. *PLoS ONE* 5: e12438

Herrmann E, Hare B, Cissewski J, Tomasello M. A. (2011). Comparison of temperament in nonhuman apes and human infants. *Dev Sci*. 14: 1393–1405.

King MC, Wilson AC (1975) Evolution at two levels in humans and chimpanzees. *Science* 188:107-16.

Leach HM (2003). Human domestication reconsidered. *Curr Anthropol*. 44:349–368.

Mathieson I, Alpaslan-Roodenberg S, Posth C, Szécsényi-Nagy A, Rohland N, Mallick S, Olalde I, Broomandkhoshbacht N, Candilio F, Cheronet O, Fernandes D, Ferry M, Gamarra B, Fortes GG, Haak W, Harney E, Jones E, Keating D, Krause-Kyora B, Kucukkalipci I, Michel M, Mittnik A, Nägele K, Novak M, Oppenheimer J, Patterson N, Pfrengle S, Sirak K, Stewardson K, Vai S, Alexandrov S, Alt KW, Andreescu R, Antonović D, Ash A, Atanassova N, Bacvarov K, Gusztáv MB, Bocherens H, Bolus M, Boroneanț A, Boyadzhiev Y, Budnik A, Burmaz J, Chohadzhiev S, Conard NJ, Cottiaux R, Čuka M, Cupillard C, Drucker DG, Elenski N, Francken M, Galabova B, Ganetsovski

G, Gély B, Hajdu T, Handzhyiska V, Harvati K, Higham T, Iliev S, Janković I, Karavanić I, Kennett DJ, Komšo D, Kozak A, Labuda D, Lari M, Lazar C, Leppek M, Leshtakov K, Vetro DL, Los D, Lozanov I, Malina M, Martini F, McSweeney K, Meller H, Mendišić M, Mirea P, Moiseyev V, Petrova V, Price TD, Simalcsik A, Sineo L, Šlaus M, Slavchev V, Stanev P, Starović A, Szeniczey T, Talamo S, Teschler-Nicola M, Thevenet C, Valchev I, Valentin F, Vasilyev S, Veljanovska F, Venelinova S, Veselovskaya E, Viola B, Virag C, Zaninović J, Zäuner S, Stockhammer PW, Catalano G, Krauß R, Caramelli D, Zariņa G, Gaydarska B, Lillie M, Nikitin AG, Potekhina I, Papathanasiou A, Borić D, Bonsall C, Krause J, Pinhasi R, Reich D (2018) The genomic history of southeastern Europe. *Nature*. 555(7695):197-203. doi: 10.1038/nature25778.

Mathieson I, Lazaridis I, Rohland N, Mallick S, Patterson N, Roodenberg SA, Harney E, Stewardson K, Fernandes D, Novak M, et al. (2015). Genome-wide patterns of selection in 230 ancient Eurasians. *Nature* 528: 499-503. doi: 10.1038/nature16152

Murphy E, Benítez-Burraco A (2018a). Paleo-oscillomics: inferring aspects of Neanderthal language abilities from gene regulation of neural oscillations. *J Anthropol. Sci* 96: 111-124 doi 10.4436/jass.96010

Murphy E, Benítez-Burraco A (2018b) Toward the language oscillogenome. *Front. Psychol.* 9: 1999 doi: 10.3389/fpsyg.2018.01999

Niego A, Benítez-Burraco A (2019) Williams syndrome, human self-domestication, and language evolution. *Front. Psychol.* 10:521 doi: 10.3389/fpsyg.2019.00521

Pääbo S (2014) The human condition-a molecular approach. *Cell* 157(1):216-26. doi: 10.1016/j.cell.2013.12.036.

Pendleton AL, Shen F, Taravella AM, Emery S, Veeramah KR, Boyko AR, Kidd JM (2018) Comparison of village dog and wolf genomes highlights the role of the neural crest in dog domestication. *BMC Biol.* 16(1): 64.

Persson ME, Wright D, Roth LS, Batakis P, Jensen P. (2016) Genomic regions associated with interspecies communication in dogs contain genes related to human social disorders. *Sci Rep.* 6: 33439.

Plavcan, JM (2012) Sexual size dimorphism, canine dimorphism, and male-male competition in primates: where do humans fit in? *Hum Nat.* 23(1):45-67. doi: 10.1007/s12110-012-9130-3.

Progovac L, Locke JL (2009) The urge to Merge: ritual insult and the evolution of syntax. *Biolinguistics*, 3.2-3: 337-354.

Shea B (1989). Heterochrony in human evolution: the case for neoteny reconsidered. *m J Phys Anthropol.* 32: 69–101.

Somel M, Franz H, Yan Z, Lorenc A, Guo S, Giger T, Kelso J, Nickel B, Dannemann M, Bahn S, Webster MJ, Weickert CS, Lachmann M, Pääbo S, Khaitovich P (2009) Transcriptional neoteny in the human brain. *Proc Natl Acad Sci.* 106: 5743–5748.

Stringer C (2016). The origin and evolution of *Homo sapiens*. *Philos Trans R Soc Lond B Biol Sci.* 371: 20150237.

Theofanopoulou C, Gastaldon S, O'Rourke T, Samuels BD, Messner A, Martins PT, Delogu F, Alamri S, Boeckx C (2017). Self-domestication in *Homo sapiens*: Insights from comparative genomics. *PLoS ONE* 12: e0185306.

Thomas J, Kirby S (2018). Self domestication and the evolution of language. *Biol Philos.* 33(1):9. doi: 10.1007/s10539-018-9612-8.

Wang X, Pipes L, Trut LN, Herbeck Y, Vladimirova AV, Gulevich RG, Kharlamova AV, Johnson JL, Acland GM, Kukekova AV, Clark AG. (2018) Genomic responses to selection for tame/aggressive behaviors in the silver fox (*Vulpes vulpes*). *Proc Natl Acad Sci U S A.* 115(41): 10398-10403.

Wilkins AS, Wrangham RW, Fitch WT. (2014). The “domestication syndrome” in mammals: a unified explanation based on neural crest cell behavior and genetics. *Genetics* 197(3):795-808. doi:10.1534/genetics.114.165423

Wrangham RW (2018). Two types of aggression in human evolution. *Proc Natl Acad Sci U S A.* 115(2): 245-253.

Zollikofer CPE, Ponce de León MS (2010). The evolution of hominin ontogenies. *Semin Cell Dev Biol.* 21:441–452.

## Figure legends

Figure 1. Location of ancient samples analyzed in the study.

## Tables

Table 1. Differently enriched sets of genes in ancient and modern groups

| Set of genes                 | Ancient<br>SNPs count | Modern<br>SNPs count | Enrichment<br>score | p-value               | p-value<br>adjusted<br>Bonferroni | Enriched<br>Bonferroni<br>0.01<br>threshold |
|------------------------------|-----------------------|----------------------|---------------------|-----------------------|-----------------------------------|---------------------------------------------|
| Synonymous SNPs              |                       |                      |                     |                       |                                   |                                             |
| Domestication                | 2165                  | 3759                 | 1.24                | 0.2138                | 1                                 | No                                          |
| Neural crest                 | 194                   | 315                  | 1.19                | 0.2353                | 1                                 | No                                          |
| Domestication<br>syndrome    | 49                    | 76                   | 0.98                | 0.326                 | 1                                 | No                                          |
| Positive selection in<br>AMH | 144                   | 268                  | -0.25               | 0.8012                | 1                                 | No                                          |
|                              |                       |                      |                     |                       |                                   |                                             |
| Nonsynonymous SNPs           |                       |                      |                     |                       |                                   |                                             |
| Domestication                | 2440                  | 4844                 | -4.32               | $1.58 \times 10^{-5}$ | 0.005                             | Modern                                      |
| Neural_crest                 | 213                   | 240                  | 5.01                | $5.36 \times 10^{-7}$ | $2 \times 10^{-4}$                | Ancient                                     |
| Domestication<br>syndrome    | 61                    | 73                   | 2.49                | 0.0127                | 1                                 | No                                          |
| Positive selection in<br>AMH | 138                   | 231                  | 0.69                | 0.4885                | 1                                 | No                                          |

**Note.** Positive enrichment score values correspond to pathways that have more SNPs in genomes of ancient individuals, while negative DNSE values correspond to pathways that have more SNPs in genomes of modern Europeans. AMH refers to anatomically-modern humans (compared to Neanderthals and Denisovans)

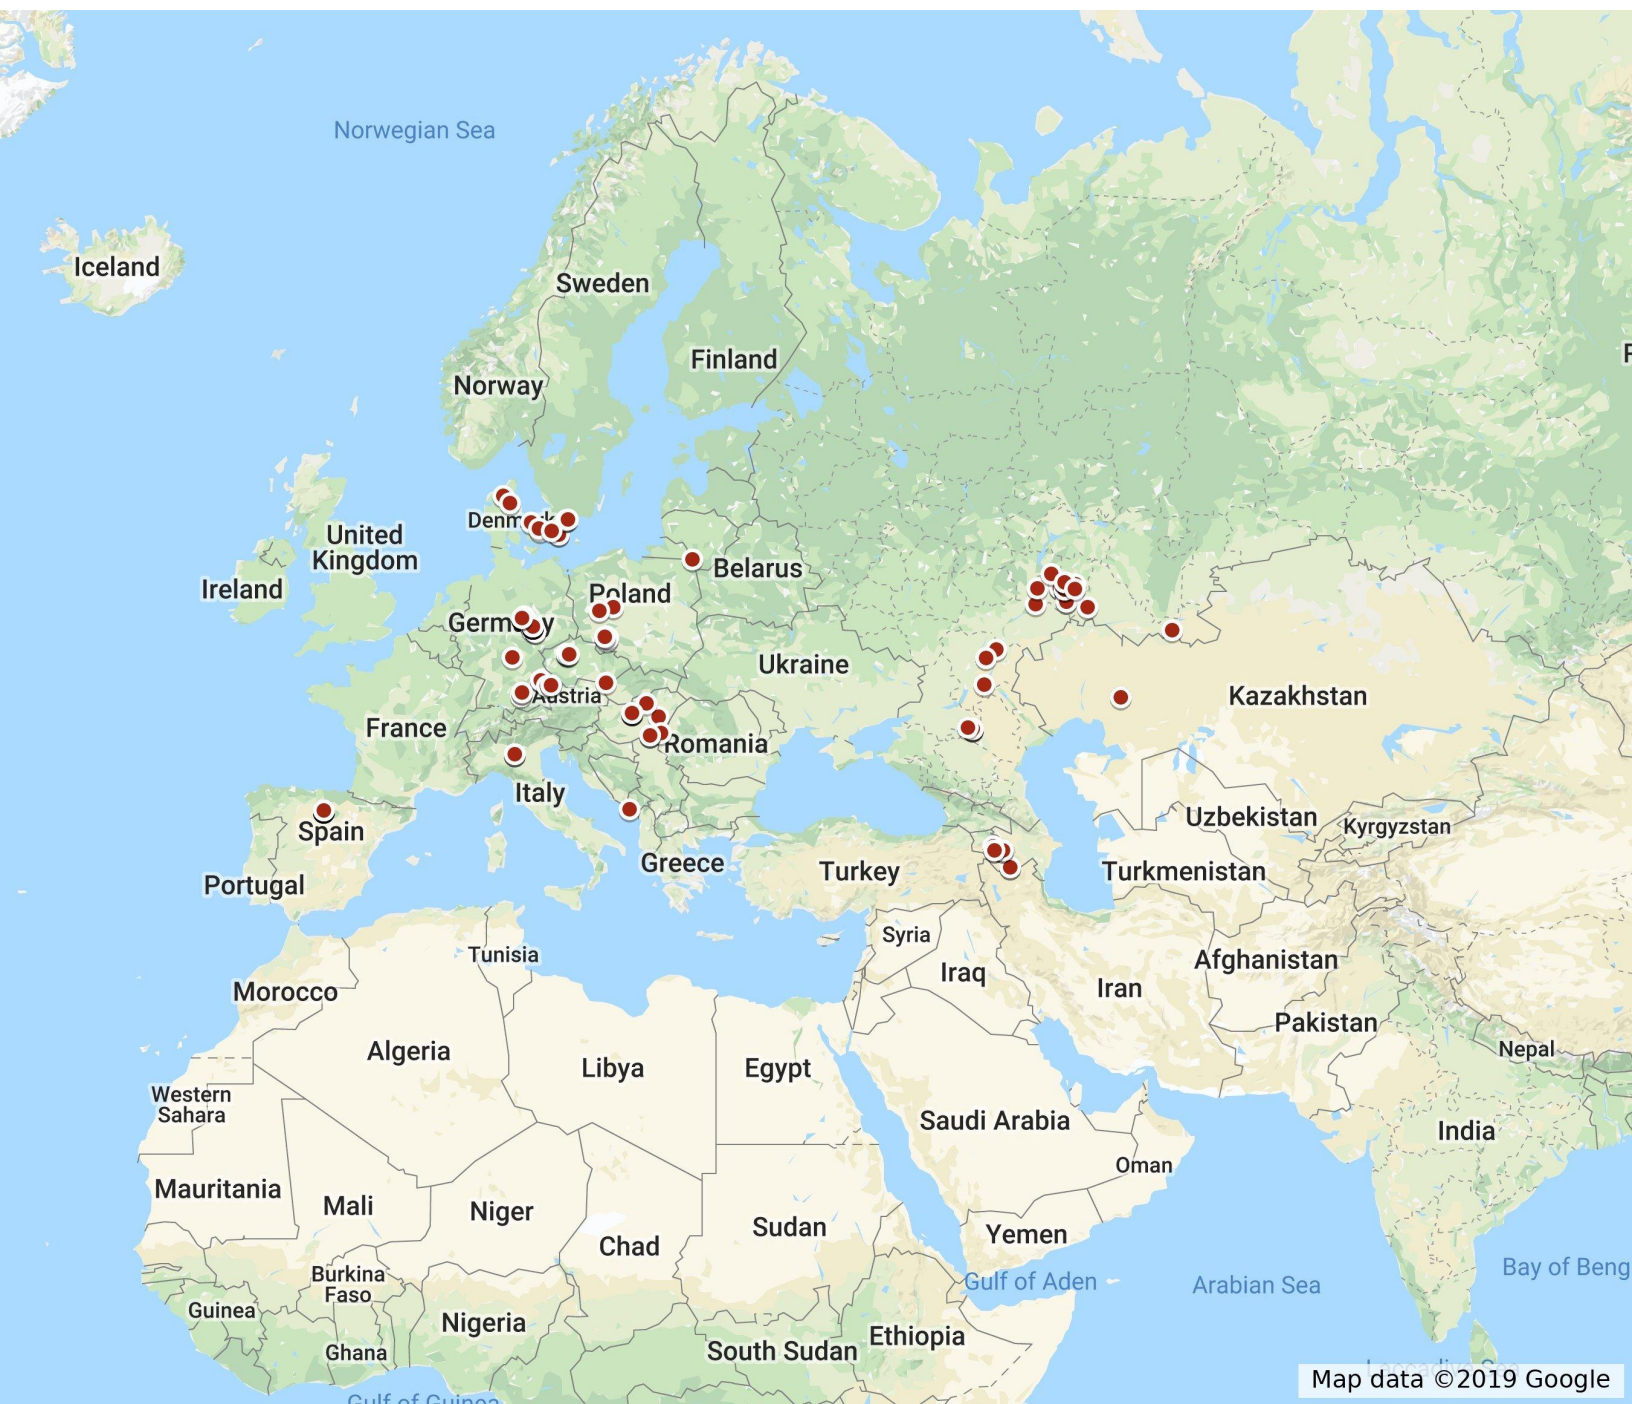



Domestication Domestication Neural crest (I Core candidates for the domestication syndrome (Wilkins et al., 2014)

|          |          |        |       |
|----------|----------|--------|-------|
| ABAI     | AMBRA1   | ALX1   | BAZ1B |
| ABCA10   | BKAF     | ALX3   | CHD7  |
| ABCA5    | CACNA1D  | ALX4   | EDN3  |
| ABCB10   | CUA5     | ASCL1  | EDNRB |
| ABCG1    | CUL11A1  | BDNF   | FGF8  |
| ABCG2    | CUQ10B   | BMP2   | FOXD3 |
| ABHD1    | DLGAP1   | BMP4   | GDNF  |
| ACAB4    | EKBB4    | BMP7   | KIT   |
| ACAD8    | FAM117A  | CAD7   | MAGOH |
| ACMSD    | GGI7     | CDH2   | MIITF |
| ACU111   | GKIA1    | CDH6   | PAX3  |
| ACU113   | GRIK3    | CMYC   | RET   |
| ACU18    | HSD3B7   | CUL1A2 | SOX10 |
| ACOX2    | HSPD1    | COL2A1 | SOX2  |
| ACOX3    | HSPE1    | CRKL   | SOX9  |
| ACSF3    | ITGA9    | DCT    | TCOF1 |
| ACSM5    | LRP1B    | DLX5   |       |
| ACSS2    | LYST     | DLX6   |       |
| ACTA1    | MOB4     | EDN1   |       |
| ADAM2    | MYLK3    | EDN3   |       |
| ADAMDEC1 | NCOAS    | EDNRA  |       |
| ADAMTS13 | NEK4     | EDNRB  |       |
| ADAMTSL3 | NT5DC2   | EFNB1  |       |
| ADRB2    | NTM      | EFNB2  |       |
| AHCY     | PLAC8L1  | ETS1   |       |
| AHCYL2   | PPAP2A   | FGF2   |       |
| AK1      | PPAPDC1B | FGF8   |       |
| AKAP1    | PRR11    | FOXD3  |       |
| ALDH16A1 | PVRL3    | GBX2   |       |
| ALDH18A1 | RETN2    | GDNF   |       |
| ALDH1L2  | RNPC3    | GFAP   |       |
| ALK      | SF3B1    | GJB1   |       |
| ALS2CR12 | SKA2     | GLI3   |       |
| AMACR    | SNRPD?   | GSC    |       |
| AMBRA1   | STAB1    | HDAC   |       |
| ANK1     | SYTL1    | HES1   |       |
| ANKDD1A  | TAS2R16  | HES5   |       |
| ANKRD2   | TEX14    | HOXA1  |       |
| ANKRD49  | TP53BP1  | HOXA2  |       |
| ANKRD50  | ZMYND10  | HOXA3  |       |
| ANKS4B   | ZNF521   | HOXB1  |       |
| APEH     |          | ID3    |       |
| APOBEC4  |          | ISL1   |       |
| APOPT1   |          | ITGB1  |       |
| ARHGAP26 |          | KIF1B  |       |
| ARID1B   |          | LHX1   |       |



|          |         |
|----------|---------|
| ARID3B   | LHX2    |
| ARL6IP1  | MASH1   |
| ARL9     | MAX     |
| ART3     | MITF    |
| ASAP1    | MSX1    |
| ASB11    | MSX2    |
| ASIP     | NEUROD  |
| ASTN1    | NEUROG1 |
| ASTN2    | NF1     |
| ATL1     | NFKB    |
| ATXN7L1  | NOTCH   |
| B3GALT1  | NRP1    |
| B3GLCT   | NRP2    |
| BAG5     | OLIG1   |
| BARD1    | OLIG2   |
| BAZ1B    | PAX3    |
| BCAP31   | PAX7    |
| BMP15    | PHOX2B  |
| BMPR1B   | PHOX2B  |
| BPI      | PMP22   |
| BRAF     | POMT1   |
| BRCA1    | RET     |
| BTAF1    | RHOB    |
| C11orf54 | ROBO1   |
| C11orf63 | ROBO2   |
| C15orf60 | SDHB    |
| C16orf71 | SDHD    |
| C17orf67 | SNAIL1  |
| C1orf109 | SNAIL2  |
| C22orf31 | SOX10   |
| C2orf40  | SOX5    |
| C2orf62  | SOX9    |
| C3orf62  | TBX1    |
| C4orf33  | TFAP2A  |
| C5orf15  | TMEM127 |
| C7orf72  | TWIST   |
| C8B      | VHL     |
| C9orf89  | WNT1    |
| C9orf96  | WNT3a   |
| CACNA1C  | WNT6    |
| CACNA1D  | WNT7B   |
| CADM2    | WNT8    |
| CAGE1    | ZEB2    |
| CALCB    | ZIC1    |
| CASP7    |         |
| CAST     |         |
| CAV1     |         |

CAV2  
CBD118  
CBD121  
CBD122  
CBX2  
CCDC38  
CCDC64B  
CCDC67  
CCDC70  
CCDC82  
CCNJ  
CCNT2  
CD27  
CD36  
CD48  
CD93  
CDH1  
CDH6  
CDK5RAP1  
CDKL3  
CDRT1  
CDRT4  
CELA1  
CENPE  
CENPM  
CEP68  
CEP97  
CERS3  
CETN3  
CHD7  
CHMP4B  
CIB4  
CKB  
CKM  
CLCA3  
CLDN17  
CLEC5A  
CLK3  
CNGA2  
CNTN6  
COA5  
COBL  
COG6  
COIL  
COL11A1  
COL14A1  
COL22A1

COL6A3  
COL9A3  
COMMD1  
COQ10B  
COX4I1  
COX4I2  
CPEB3  
CRH  
CROCC  
CRTC3  
CRYM  
C-SKI  
CSPP1  
CTTN  
CUL1  
CUX2  
CXCL10  
CYB5R1  
CYFIP1  
CYP1A1  
CYP1A2  
CYP26A1  
CYP26C1  
CYP27B1  
DACT1  
DAPK1  
DBI  
DCC  
DCST1  
DDC  
DEFB103B  
DEFB119  
DEFB122  
DGAT1  
DHDH  
DLGAP1  
DLL3  
DMRT3  
DNAH3  
DNAH9  
DNAJA1  
DNAJB9  
DNMT1  
DOCK2  
DPEP3  
DSCAM  
DTD1

DUSP19  
ECHDC1  
EDC3  
EDN3  
EDNRB  
EEA1  
EHBP1L1  
EIF2S2  
ELF2  
EMC2  
ENKUR  
ENTPD1  
ENTPD7  
EPHB4  
EPS15  
ERBB4  
ETNPPL  
ETV4  
EVC2  
EYA1  
F9  
FABP5  
FAF1  
FAIM3  
FAM107B  
FAM114A2  
FAM131B  
FAM172A  
FAM179A  
FAM40B  
FAM69A  
FANCA  
FANCB  
FAT4  
FBN3  
FBXL22  
FBXO10  
FBXO28  
FBXO31  
FBXW10  
FBXW11  
FCHSD2  
FCRL4  
FER  
FGA  
FGD6  
FGF13

FGF18  
FGF4  
FGF5  
FGF8  
FGFBP3  
FHL1  
FMO3  
FN3K  
FOXD3  
FOXI1  
FOXJ3  
FRMD6  
FRMD7  
FRMPD1  
FSTL4  
GABRA5  
GAK  
GALR1  
GAPDHS  
GCNT7  
GDNF  
GEMIN7  
GGT6  
GGT7  
GLRA1  
GNAT3  
GNG10  
GNG4  
GNPTAB  
GOLGA1  
GP2  
GPATCH8  
GPR133  
GPR139  
GPR15  
GPR174  
GPRASP2  
GPRC5A  
GPRC5B  
GPRIN2  
GRHL3  
GRIA1  
GRIA2  
GRID1  
GRIK2  
GRIK3  
HADH

HAS2  
HEATR5B  
HECA  
HEPACAM2  
HEPH  
HERC2  
HIPK2  
HMGA2  
HMMR  
HOPX  
HPS5  
HS3ST4  
HS6ST2  
HSD3B7  
HSPA13  
HSPD1  
HSPE1  
HTR4  
IFT80  
IFT81  
IGF1  
IGF2  
IGHMBP2  
IGSF1  
IGSF3  
IGSF9B  
IKZF1  
IMMP2L  
INHBC  
INPP4B  
INPP5J  
IPO4  
IQCB1  
ISG15  
ITGA2B  
ITGA9  
ITGBL1  
ITPR3  
JAM3  
JMJD1C  
JPH3  
JRKL  
KCNK10  
KDM3A  
KDM6B  
KDR  
KIAA0226

KIAA0556  
KIAA1549  
KIF1C  
KIF22  
KIF27  
KIRREL2  
KIT  
KITLG  
KLF4  
KLHDC4  
KRIT1  
KRT71  
KYNU  
LAMC2  
LAMC3  
LAP3  
LATS2  
LCAT  
LCLAT1  
LEPREL1  
LHFPL3  
LIAS  
LILRA6  
LIMD1  
LIN28B  
LINC01927  
LINGO2  
LMF1  
LRIG3  
LRP1B  
LRRC32  
LRRC36  
LRRN3  
LSM3  
LTF  
LYST  
MAFK  
MAGOH  
MAOA  
MAOB  
MAP3K1  
MAP3K4  
MAP7D2  
MAP7D3  
MAPK10  
MARCH10  
MARCH7



MARK2  
MARK3  
MARVELD3  
MATN2  
MBD2  
MBP  
MC1R  
MC2R  
MC4R  
MCF2  
MCHR2  
MED23  
MERTK  
METAP2  
METTL22  
METTL8  
MFAP3  
MGAM  
MGC12345  
MIER3  
MIF4GD  
MIIP  
MINOS1  
MITF  
MKKS  
MMP16  
MOB4  
MORC1  
MPV17L  
MRPL11  
MRPL52  
MSI2  
MSRB3  
MSTN  
MT1F  
MT1L  
MT2A  
MTIF2  
MTRF1  
MURC  
MVK  
MYBPC1  
MYLK3  
MYO15A  
MYO9A  
MYOF  
NAPRT1

NCAPD3  
NCAPG  
NCOA6  
NCTIN1  
NDUFB1  
NEK1  
NEK4  
NFAM1  
NFKBIZ  
NID2  
NINJ1  
NIPA2  
NIPBL  
NKAIN2  
NOCT  
NOL4  
NOLC1  
NOSTRIN  
NOTCH2  
NPAS3  
NPFFR2  
NPTX1  
NR2F2  
NR3C1  
NR3C2  
NRF1  
NRG2  
NRG4  
NRSA2  
NRXN1  
NT5DC2  
NTAN1  
NTM  
NUDT15  
NUMB  
NUP133  
NUP54  
NXPE3  
OLIG1  
OMA1  
OPCML  
OPTC  
OR10K1  
OR13C8  
OR2B11  
OR4D6  
OR51A7

OR9A4  
OTOF  
PAFAH2  
PARP12  
PARVG  
PAX2  
PAX3  
PCDH18  
PCDHA1  
PCDHB4  
PCSK5  
PDE4D  
PDE4DIP  
PDE5A  
PDE7B  
PDILT  
PDRG1  
PDXDC1  
PEX7  
PHF2  
PHF20  
PHLDB3  
PIK3C3  
PITRM1  
PJA2  
PKD1L1  
PLA2G2E  
PLA2G3  
PLAC1  
PLAC8L1  
PLAG1  
PLCE1  
PLEKHH1  
PLEKHM3  
PLIN3  
PLXNA4  
PMEL  
PML  
Pol  
POLI  
POLR1E  
POMC  
POP1  
PPAP2A  
PPAPDC1B  
PPARD  
PPFIBP1

PPM1D  
PPP1R13B  
PPP2CA  
PRICKLE4  
PRKAG1  
PRKAG3  
PRKCZ  
PRKG2  
PRMT3  
PROM1  
PRR11  
PRX  
PSMB7  
PSPH  
PSTK  
PTPN4  
PTPRR  
PTPRS  
PUSL1  
PVRL3  
Q2ABD2  
RAB3GAP1  
RABGAP1L  
RABL3  
RALGAPA2  
RALY  
RANBP17  
RAPH1  
RASGEF1B  
RBM11  
RBP5  
RCSD1  
REEP1  
RELL1  
RELT  
RET  
RFTN2  
RG9MTD3  
RHBDD1  
RHPN1  
RIMKLA  
RNASE6  
RNF103  
RNF144B  
RNPC3  
ROBO1  
RPL3

RPL31  
RRN3  
RRN3P1  
RRNRP2  
RSL1D1  
RSPO2  
RTP3  
RXFP2  
RYS1  
S100A12  
SAE1  
SCARB2  
SCN9A  
SCP2D1  
SCPEP1  
SCRIB  
SDAD1  
SDHAF3  
SDK2  
SEC24A  
SEC63  
SEMA3D  
SEMA6A  
SENP5  
SENP7  
40422  
SERINC3  
SETBP1  
SETD9  
SETMAR  
SF3B1  
SGCD  
SH2D5  
SH3GL2  
SHC4  
SIAE  
SKA2  
SKI  
SKP1  
SLC22A13  
SLC22A15  
SLC22A18  
SLC25A38  
SLC35D1  
SLC35F5  
SLC39A7  
SLC39A8

SLC41A2  
SLC43A1  
SLC46A1  
SLC5A1  
SLC5A4  
SLC6A1  
SLC6A17  
SLC9A6  
SLCO1A2  
SMAD2  
SMC4  
SMG1  
SMG6  
SMIM23  
SMO  
SMYD2  
SNAP29  
SNCG  
SNRPD1  
SOCS4  
SOX10  
SOX2  
SOX6  
SOX9  
SPATA19  
SPATA21  
SPATA7  
SPERT  
SPHKAP  
SPINT1  
SPTAN1  
SPTBN5  
SREBF1  
SRP72  
SRRM2  
STAB1  
STARD5  
STARD6  
STC2  
STK10  
STK11IP  
STS  
STX7  
STXBP6  
SUN3  
SURF2  
SUSD3

SYNJ2  
SYNM  
SYTL1  
TAOK1  
TAS2R1  
TAS2R16  
TAS2R3  
TAS2R38  
TBC1D9  
TBXAS1  
TCOF1  
TCTN1  
TCTN3  
TEKT3  
TEX14  
TF  
TFCP2L1  
TH  
THBS2  
THEGL  
THUMPD1  
THYN1  
TLX3  
TMEM114  
TMEM132D  
TMEM159  
TMEM182  
TMEM242  
TMEM59L  
TMEM71  
TNFRSF9  
TNKS2  
TOE1  
TP53BP1  
TPH1  
TRA2B  
TRAPPC8  
TRBV25OR9-2  
TRDN  
TRIM16  
TRIM59  
TRIO  
TRMT61A  
TRPM1  
TRPV6  
TRY1  
TRY2



TRY3  
TSTD2  
TTC21B  
TTC39A  
TUBGCP5  
TVP23B  
TVP23C  
TXN2  
TXNRD2  
TYK2  
TYRP1  
U2  
UBE2B  
UBXN10  
ULBP3  
UMOD  
UNC93A  
URB2  
USP45  
UVRAG  
V1R  
VDAC1  
VEZT  
VPS26B  
VRK1  
VWC2  
VWDE  
WASF3  
WDR17  
WDR62  
WDR90  
WFDC8  
WIPF2  
WIPF3  
WNK2  
WWC1  
XCR1  
XPBP  
XPC  
XPO6  
YSK4  
YWHAH  
ZC3H3  
ZFAT  
ZFYVE19  
ZMYND10  
ZNF236

ZNF286A  
ZNF286B  
ZNF436  
ZNF492  
ZNF516  
ZNF521  
ZNF555  
ZNF622  
ZNF679  
ZNF780B  
ZP2  
ZPBP  
ZZEF1
